# Supplementary material for: Evaluation of AMG510 Therapy on KRAS-Mutant Non–Small Cell Lung Cancer and Colorectal Cancer Cell Using a 3D Invasive Tumor Spheroid System under Normoxia and Hypoxia
Source: MDPI journal article supplement (doi:10.3390/bioengineering9120792), 2022-12-12
Supplement: s1 [file s1]

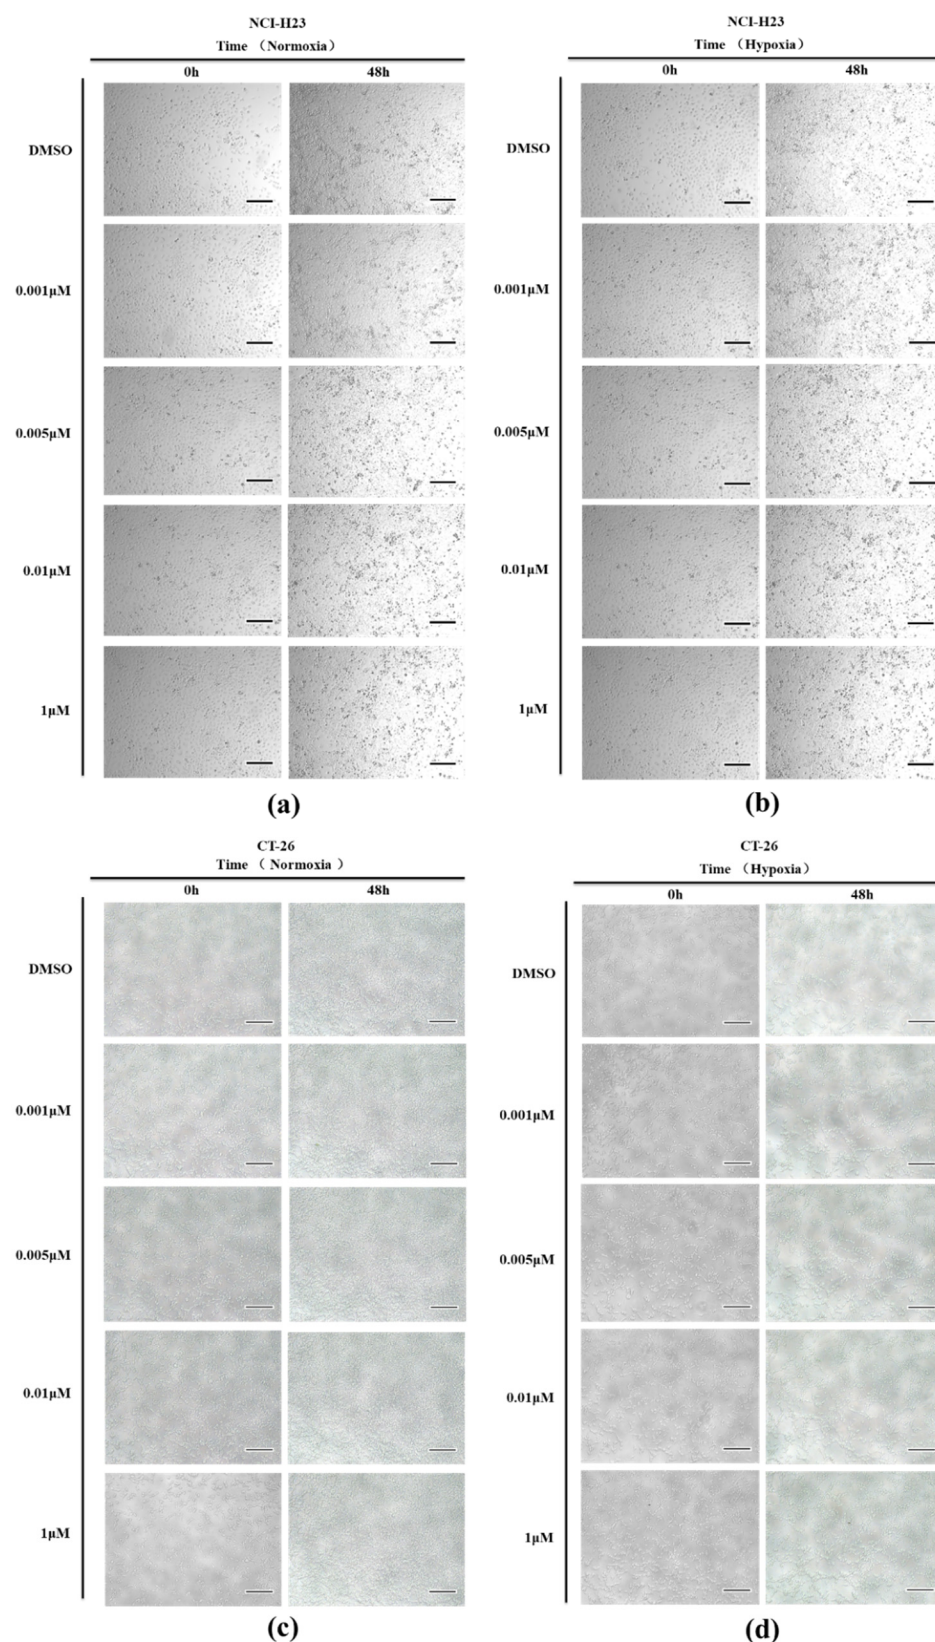

**Figure S1.** The bright field images of NCI-H23 and CT-26 treated with AMG510 in 2D, the drug doses include 0.001  $\mu$ M, 0.005  $\mu$ M, 0.01  $\mu$ M, 1  $\mu$ M. (a) NCI-H23 normoxia. (b) NCI-H23 hypoxia. (c) CT-26 normoxia. (d) CT-26 hypoxia. Scale bar: 200  $\mu$ M.
